# Supplementary material
Source: publisher figshare collection journal article supplement (https://gsapubs.figshare.com/ndownloader/files/22759397)
Supplement: Supplementary file 1 [file 22759397]

**APPENDIX A: SEA-LEVEL INDEX POINTS**

The standardized methodology for reconstructing former sea levels from low energy, sedimentary environments has been established during the International Geological Correlation Programs (IGCP) (van de Plassche, 1986; Shennan and Horton, 2002; Edwards, 2006). To be a validated sea-level index point (SLI), a sample must have a location, an age and a known relationship between the sample and a known tidal level and the indicative meaning (Shennan, 1986; van de Plassche, 1986). The indicative meaning is constructed of two parameters, the reference water level (e.g. mean higher high water (MHHW)) and the indicative range (the vertical range over which the sample could occur). To constrain the indicative meaning of the index points in the US Atlantic database, we have used published zonations of modern vegetation (Redfield, 1972; Niering and Warren, 1980; Lefor et al., 1987; Gehrels, 1994) and the distribution of microfossils (Gehrels, 1994) supported by  $\delta^{13}\text{C}$  values from the radiocarbon-dated sediments (Andrews et al., 1998; Törnqvist et al., 2004). As an example, where we have a floral and/or faunal indication that a sample was formed within a salt marsh environment but cannot be identified as specifically high or low marsh, the index point is conservatively estimated to have formed between MHHW and mean tide level (Törnqvist et al., 2004). For samples where we have a positive identification of plant macrofossil species, we can reduce the indicative range. Where authors have used microfossils to quantitatively assess the relationship between the sample and former sea level, these predictions of the indicative meaning have been retained. In practice, over 70% of the samples in the database can only be identified as salt-marsh deposits.

The relative sea level of the sea-level index points is calculated using the equation:

$$\text{Relative Sea Level} = \text{Elevation}_{\text{sample}} - \text{Reference Water Level}_{\text{sample}}$$

where the elevation and reference water level are expressed in meters relative to the national datum, NAVD 88, and subsequently corrected to local mean sea level (MSL).

For each sample, we calculated the vertical error of the index point from a variety of factors that are inherent to sea-level research (Shennan, 1986). Further errors are incorporated including the type of coring equipment used, techniques of depth measurement and the compaction of the sediment during penetration (Woodroffe, 2006). We also included an error estimate associated with the leveling of the sample with respect to NAVD 88. For high precision leveling using modern techniques, this can be as low as  $\pm 0.05$  m but can rise as high as  $\pm 0.5$  m for less precise methods. A further error is included due to the leveling of the sample to local tide levels. This is typically  $\pm 0.1$  m but may be much larger, particularly when samples are collected offshore (Shennan, 1986). The errors in this study do not include the effects of tidal range change through time; we assume that this influence is minimal (Gehrels et al., 1995). The total error ( $E_h$ ) for each sample is then calculated from the expression:

$$E_h = (e_1^2 + e_2^2 \dots + e_n^2)^{1/2}$$

Where  $e_1 \dots e_n$  are the individual sources of error.

A further source of error in sea-level reconstruction is sediment consolidation, that is, compression of a sedimentary package by its own weight or the weight from overlying sediment (Kaye and Barghoorn, 1964). The significance of sediment consolidation was recognized from early studies of North American (Bloom, 1964; Kaye and Barghoorn, 1964) and European (Jelgersma, 1961; Streif, 1971; van de Plassche, 1980) salt marshes. If consolidation is not corrected for, then index points will be lowered from their original elevation and the rate and magnitude of relative sea-level rise will be overestimated. However, correcting for the

compaction of sediments is a complex process involving many variables (Pizzuto and Schwendt, 1997). Therefore, we have reduced the influence of compaction by only employing basal peat samples, which are deposited directly on the presumed compaction-free substrate (Kaye and Barghoorn, 1964).

Every SLI in the validated database (Figure DR1, Figure DR2) was radiocarbon dated and calibrated using CALIB 5.0.1 (Stuiver et al., 2005). We used a laboratory multiplier of 1 with 95% confidence limits and employed the dataset IntCal04 (Reimer et al., 2004). The database contains samples that were dated by Accelerator Mass Spectrometry (AMS), Gas Proportional Counting (GPC) and Liquid Scintillation Counting (LSC). Sample material in the database varies from dates on bulk peat to dates on identifiable salt marsh rhizomes.

## **APPENDIX B: LATE HOLOCENE RATES OF RELATIVE SEA-LEVEL RISE**

We have used validated geological observations from basal peat over the last 4 ka (the late Holocene) to reconstruct background rates of sea-level rise. We assume that the ice-equivalent meltwater input over the last 4 ka is either zero (Douglas, 1995; Peltier, 1996, 2002) or minimal (Milne et al., 2005). A meltwater input of 1 m during the late Holocene (Church et al., 2008) would reduce the estimate of subsidence by  $0.25 \text{ mm yr}^{-1}$ . We also assume that the tectonic component is small, except in close proximity to the Cape Fear Arch, North Carolina, which has experienced uplift (Marple and Talwani, 2004).

When calculating the background rate of relative sea-level rise, it is necessary to remove the modern component, as this will overestimate the background rate due to the sea-level rise experienced during the 20<sup>th</sup> century ( $\sim 0.2 - 0.3 \text{ m}$  along the US Atlantic coast). In this study, we remove this modern sea level rise by using the nearest reliable tide gauge rate to extrapolate to MSL in 1900 AD. We then express all dates with respect to 1900 AD. At all sites the linear

regression is run over the last 4 ka and is forced through zero. Regression errors are at the 95% confidence level. This contrasts with previous work (Gornitz, 1995; Peltier, 1996) that reported the error as the standard deviation and not the standard error.

Table DR1. Location of the 19 sites along the US Atlantic Coast and the rate of late Holocene (last 4 ka) relative sea-level rise (RSLR) derived from geological data. The references for the geological data are shown. GPS rates of vertical motion are from (1) Snay et al. (2007) and (2) Sella et al. (2007). Geological and GPS rates are shown with two sigma errors. Positive and negative values from the geological and GPS data refer to subsidence and uplift, respectively.

| Site Number | Site Name                        | Late Holocene RSLR (mm yr <sup>-1</sup> ) | Rate from Nearest GPS Station (mm yr <sup>-1</sup> ) | References                                                                                                                  |
|-------------|----------------------------------|-------------------------------------------|------------------------------------------------------|-----------------------------------------------------------------------------------------------------------------------------|
| 1           | Sanborn Cove, Maine              | 0.7 ± 0.1                                 | 1.9 ± 2.0 (1)                                        | Gehrels and Belknap, 1993; Gehrels, 1999                                                                                    |
| 2           | Phippsburg, Maine                | 0.7 ± 0.5                                 | -0.2 ± 3.2 (2)                                       | Gehrels et al., 1996                                                                                                        |
| 3           | Boston, Massachusetts            | 0.6 ± 0.1                                 | 2.3 ± 1.2 (2)                                        | Newman et al., 1980; Donnelly, 2006                                                                                         |
| 4           | Barnstable, Massachusetts        | 1.2 ± 0.2                                 | N/A                                                  | Redfield and Rubin, 1962; Stuiver et al., 1963                                                                              |
| 5           | Clinton, Connecticut             | 1.1 ± 0.1                                 | N/A                                                  | Cinquemani et al., 1982; van de Plassche, 1991; Nydick et al., 1995; van de Plassche et al., 2002                           |
| 6           | Hudson River, New York           | 1.2 ± 0.1                                 | 0.6 ± 3.0 (2)                                        | Newman et al., 1980; Pardi et al., 1984                                                                                     |
| 7           | Northern Long Island, New York   | 0.8 ± 0.3                                 | 1.6 ± 3.0                                            | Cinquemani et al., 1982; Pardi et al., 1984                                                                                 |
| 8           | Sandy Hook, New Jersey           | 1.4 ± 0.7                                 | 2.2 ± 1.4 (1)                                        | Cinquemani et al., 1982                                                                                                     |
| 9           | Atlantic City, New Jersey        | 1.3 ± 0.2                                 | N/A                                                  | Stuiver and Daddario, 1963; Cinquemani et al., 1982; Pardi et al., 1984; Psuty, 1986                                        |
| 10          | Inner Delaware Estuary, Delaware | 1.7 ± 0.2                                 | 2.9 ± 2.0 (2)                                        | Belknap, 1975; Belknap and Kraft, 1977; Nikitina et al., 2000                                                               |
| 11          | Lewes, Delaware                  | 1.2 ± 0.2                                 | 1.1 ± 2.3 (1)                                        | Elliot, 1972; Belknap, 1975; Belknap and Kraft, 1977; Fletcher et al., 1993; Ramsey and Baxter, 1996; Nikitina et al., 2000 |
| 12          | Blackwater, Maryland             | 1.3 ± 0.2                                 | 2.2 ± 2.3 (1)                                        | Cinquemani et al., 1982                                                                                                     |
| 13          | Eastern Shore, Virginia          | 0.9 ± 0.3                                 | 3.5 ± 1.6 (2)                                        | Engelhart and Kemp (unpublished)                                                                                            |
| 14          | Outer Banks, North Carolina      | 1.0 ± 0.1                                 | N/A                                                  | Horton et al., 2009 Cinquemani et al., 1982                                                                                 |
| 15          | Beaufort, North Carolina         | 0.7 ± 0.1                                 | N/A                                                  | Horton et al. 2009; Cinquemani et al., 1982; Spaur and Snyder, 1999                                                         |
| 16          | Wilmington, North Carolina       | 0.8 ± 0.3                                 | N/A                                                  | Cinquemani et al., 1982                                                                                                     |
| 17          | Georgetown, South Carolina       | 0.8 ± 0.1                                 | N/A                                                  | Cinquemani et al., 1982                                                                                                     |
| 18          | Charleston, South Carolina       | 0.6 ± 0.1                                 | 1.6 ± 1.7 (1)                                        | Cinquemani et al., 1982                                                                                                     |
| 19          | Port Royal, South Carolina       | 0.6 ± 0.2                                 | N/A                                                  | Cinquemani et al., 1982                                                                                                     |

## **APPENDIX C: UNCERTAINTY OF SEA-LEVEL TRENDS FROM TIDE GAUGE DATA**

We identified 10 suitable tide gauge records along the US Atlantic Coast from the Permanent Service for Mean Sea Level (Woodworth and Player, 2003) that are at least 50 years in length and where the influence of non-GIA subsidence, such as groundwater withdrawal, is minimal. The tide gauge record at The Battery, New York, is truncated to only include data from the 20<sup>th</sup> century.

Formal uncertainties of trends of relative sea-level (RSL) obtained from tide gauge data are usually a few tenths of a mm per year for records longer than about 50 years. These formal uncertainties are optimistic, since tide gauge records do not satisfy the criteria for a linear regression, i.e., that the data consist of a trend plus Gaussian random noise. The records also contain interannual and longer variations of high amplitude that can negate the underlying trend of sea level for even many decades in some cases (Douglas, 2001).

As glacial isostatic adjustment (GIA) is considered to be the dominant control on the variation in the tide gauge records, we can assess the appropriate error term by running a linear regression through the rates from long-term tide-gauge records, going from areas of isostatic uplift in Canada to the proposed peak of GIA in the mid-Atlantic (Figure DR3). It is apparent that these rates lie along a straight line with little variation. Therefore, we can run a linear regression through these rates to produce a single estimate of the error for the tide gauges along the US Atlantic Coast of  $\pm 0.3 \text{ mm yr}^{-1}$ .

## SUPPLEMENTARY REFERENCES

- Andrews, J.E., Greenaway, A.M., and Dennis, P.F., 1998, Combined carbon isotope and C/N ratios as indicators of source and fate of organic matter in a poorly flushed, tropical estuary: Hunts Bay, Kingston Harbour, Jamaica: *Estuarine Coastal and Shelf Science*, v. 46, p. 743-756.
- Belknap, D.F., 1975, Dating of late Pleistocene and Holocene relative sea levels in coastal Delaware: Thesis, University of Delaware, Newark, 95pp.
- Belknap, D.F., and Kraft, J.C., 1977, Holocene relative sea-level changes and coastal stratigraphic units on the northwest flank of the Baltimore Canyon Trough Geosyncline: *Journal of Sedimentary Petrology*, v. 47, p. 610-629.
- Bloom, A.L., 1964, Peat accumulation and compaction in a Connecticut coastal marsh: *Journal of Sedimentary Research*, v. 34, p. 599-603.
- Church, J.A., White, N.J., Aarup, T., Wilson, W.S., Woodworth, P.L., Domingues, C.M., Hunter, J.R., and Lambeck, K., 2008, Understanding global sea levels: past, present and future: *Sustainability Science*, v. 3, p. 9-22.
- Cinquemani, L.J., Newman, W.S., Sperling, J.A., Marcus, L.F., and Pardi, R.R., 1982, Holocene sea level fluctuations, magnitudes and causes, IGCP Annual Meeting: Columbia, South Carolina.
- Donnelly, J.P., 2006, A revised late Holocene sea-level record for northern Massachusetts, USA: *Journal of Coastal Research*, v. 22, p. 1051-1061.
- Douglas, B.C., 1995, Global Sea-Level Change - Determination and Interpretation: *Reviews of Geophysics*, v. 33, p. 1425-1432.
- Douglas, B.C., 2001, Sea Level Change in the Era of the Recording Tide Gauge, *in* Douglas, B.C., Kearney, M.S., and Leatherman, S.P., eds., *Sea Level Rise: History and Consequences*, pp. 37-64: Academic Press, San Diego.
- Edwards, R.J., 2006, Sea level studies: low energy coasts as sedimentary indicators, *in* Elias, S.A., ed., *Encyclopedia of Quaternary Science*: Amsterdam, Elsevier, p. 2994-3006.
- Elliot, G.K., 1972, The Great Marsh, Lewes, Delaware: The physiography, classification and geologic history of a coastal marsh: College of Marine Studies, University of Delaware, Technical Report 19, 139pp.
- Engelhart, S.E., and Kemp, A.C., unpublished, University of Pennsylvania.
- Fletcher, C.H., Vanpelt, J.E., Brush, G.S., and Sherman, J., 1993, Tidal Wetland Record of Holocene Sea-Level Movements and Climate History: *Palaeogeography Palaeoclimatology Palaeoecology*, v. 102, p. 177-213.

- Gehrels, W.R., 1994, Determining Relative Sea-Level Change from Salt-Marsh Foraminifera and Plant Zones on the Coast of Maine, USA: *Journal of Coastal Research*, v. 10, p. 990-1009.
- Gehrels, W.R., 1999, Middle and late holocene sea-level changes in Eastern Maine reconstructed from foraminiferal saltmarsh stratigraphy and AMS C-14 dates on basal peat: *Quaternary Research*, v. 52, p. 350-359.
- Gehrels, W.R., and Belknap, D.F., 1993, Neotectonic History of Eastern Maine Evaluated from Historic Sea-Level Data and C-14 Dates on Salt-Marsh Peats: *Geology*, v. 21, p. 615-618.
- Gehrels, W.R., Belknap, D.F., Pearce, B.R., and Gong, B., 1995, Modeling the contribution of M2 tidal amplification to the Holocene rise of mean high water in the Gulf of Maine and the Bay of Fundy: *Marine Geology*, v. 124, p. 71-85.
- Gehrels, W.R., Belknap, D.F., and Kelley, J.T., 1996, Integrated high-precision analyses of Holocene relative sea-level changes: Lessons from the coast of Maine: *Geological Society of America Bulletin*, v. 108, p. 1073-1088.
- Gornitz, V., 1995, A comparison of differences between recent and late Holocene sea-level trends from eastern North America and other selected regions: *Journal of Coastal Research*, p. 287-297.
- Horton, B.P., Peltier, W.R., Culver, S.J., Drummond, R., Engelhart, S.E., Kemp, A.C., Mallinson, D., Thielert, E.R., Riggs, S.R., Ames, D.V., and Thomson, K.H., Holocene sea-level changes along the North Carolina Coastline and their implications for glacial isostatic adjustment models: *Quaternary Science Reviews*, v. In Press, Corrected Proof.
- Jelgersma, S., 1961, Holocene sea-level changes in the Netherlands: *Mededelingen Geologische Stichting Serie*, v. C. VI 7, p. 1-100.
- Kaye, C.A., and Barghoorn, E.S., 1964, Late Quaternary Sea-Level Change and Crustal Rise at Boston, Massachusetts, with Notes on the Autocompaction of Peat: *Geological Society of America Bulletin*, v. 75, p. 63-80.
- Kemp, A.C., High resolution studies of late Holocene relative sea-level: Thesis, University of Pennsylvania, Philadelphia, 385pp.
- Lefor, M.W., Kennard, W.C., and Civco, D.L., 1987, Relationships of Salt-Marsh Plant-Distributions to Tidal Levels in Connecticut, USA: *Environmental Management*, v. 11, p. 61-68.
- Marple, R., and Talwani, P., 2004, Proposed Shenandoah Fault and East-Coast Stafford Fault System and their implications for Eastern U.S. Tectonics: *Southeastern Geology*, v. 43, p. 57-80.

- Milne, G.A., Long, A.J., and Bassett, S.E., 2005, Modelling Holocene relative sea-level observations from the Caribbean and South America: *Quaternary Science Reviews*, v. 24, p. 1183-1202.
- Newman, W.S., Cinquemani, L.J., Pardi, R.R., and Marcus, L.F., 1980, Holocene Delevelling of the United States' East Coast, *in* Morner, N., ed., *Earth Rheology, Isostasy and Eustasy*: New York, Wiley, p. 449-463.
- Niering, W.A., and Warren, R.S., 1980, Vegetation Patterns and Processes in New England Salt Marshes: *Bioscience*, v. 30, p. 301-307.
- Nikitina, D.L., Pizzuto, J.E., Schwimmer, R.A., and Ramsey, K.W., 2000, An updated Holocene sea-level curve for the Delaware coast: *Marine Geology*, v. 124, p. 137-159.
- Nydic, K.R., Bidwell, A.B., Thomas, E., and Varekamp, J.C., 1995, A Sea-Level Rise Curve from Guilford, Connecticut, USA: *Marine Geology*, v. 124, p. 137-159.
- Pardi, R.R., Tomecek, L., and Newman, W.S., 1984, Queens College Radiocarbon Measurements IV: *Radiocarbon*, v. 26, p. 412-430.
- Peltier, W.R., 1996, Global sea level rise and glacial isostatic adjustment: An analysis of data from the east coast of North America: *Geophysical Research Letters*, v. 23, p. 717-720.
- Peltier, W.R., 2002, On eustatic sea level history: Last Glacial Maximum to Holocene: *Quaternary Science Reviews*, v. 21, p. 377-396.
- Pizzuto, J.E., and Schwendt, A.E., 1997, Mathematical modeling of autocompaction of a Holocene transgressive valley-fill deposit, Wolfe Glade, Delaware: *Geology*, v. 25, p. 57-60.
- Psuty, N.P., 1986, Holocene sea level in New Jersey: *Physical Geography*, v. 7, p. 156-167.
- Ramsey, K.W., and Baxter, S.J., 1996, Radiocarbon dates from Delaware: A Compilation: Delaware Geological Survey Report of Investigations No. 54, Newark, Delaware, 17pp.
- Redfield, A.C., 1972, Development of a New England Salt Marsh: *Ecological Monographs*, v. 42, p. 201-237.
- Redfield, A.C., and Rubin, M., 1962, Age of Salt Marsh Peat and Its Relation to Recent Changes in Sea Lev at Barnstable Massachusetts: *Proceedings of the National Academy of Sciences of the United States of America*, v. 48, p. 1728-1735.
- Reimer, P.J., Baillie, M.G.L., Bard, E., Bayliss, A., Beck, J.W., Bertrand, C.J.H., Blackwell, P.G., Buck, C.E., Burr, G.S., Cutler, K.B., Damon, P.E., Edwards, R.L., Fairbanks, R.G., Friedrich, M., Guilderson, T.P., Hogg, A.G., Hughen, K.A., Kromer, B.,



- McCormac, G., Manning, S., Bronk Ramsey, C., Reimer, R.W., Remmele, S., Southon, J.R., Stuiver, M., Talamo, S., Taylor, F.W., van der Plicht, J., and Weyhenmeyer, C.E., 2004, IntCal04 terrestrial radiocarbon age calibration, 0-26 cal kyr BP: *Radiocarbon*, v. 46, p. 1029-1058.
- Shennan, I., 1986, Flandrian sea-level changes in the Fenland. II: Tendencies of sea-level movement, altitudinal changes, and local and regional factors: *Journal of Quaternary Science*, v. 1, p. 155-179.
- Shennan, I., and Horton, B., 2002, Holocene land- and sea-level changes in Great Britain: *Journal of Quaternary Science*, v. 17, p. 511-526.
- Spaur, C.C., and Snyder, S.W., 1999, Coastal wetlands evolution at the leading edge of the marine transgression: Jarrett Bay, North Carolina: *Journal of the Elisha Mitchell Scientific Society*, v. 115, p. 20-46.
- Streif, H., 1971, Stratigraphie und Faziesentwicklung im Kunstengebiet von Woltzeten in Ostfriesland: *Beihefte Geologisches Jahrbuch*, v. 119, p. 1-58.
- Stuiver, M., and Daddario, J.J., 1963, Submergence of the New Jersey Coast: *Science*, v. 142, p. 951.
- Stuiver, M., Deevey, E.S., and Rouse, I., 1963, Yale Natural Radiocarbon Measurements VIII: *Radiocarbon*, v. 5, p. 312-341.
- Stuiver, M., Reimer, P.J., and Reimer, R., 2005, Radiocarbon calibration program revision 5.0.1.
- Törnqvist, T.E., Gonzalez, J.L., Newsom, L.A., van der Borg, K., de Jong, A.F.M., and Kurnik, C.W., 2004, Deciphering Holocene sea-level history on the US Gulf Coast: A high-resolution record from the Mississippi Delta: *Geological Society of America Bulletin*, v. 116, p. 1026-1039.
- van de Plassche, O., 1980, Compaction and other sources of error in obtaining sea-level data: Some results and consequences: *Eiszeitalter und Gegenwart*, v. 30, p. 171-181.
- van de Plassche, O., 1986, Sea-level research: a manual for the collection and evaluation of data: *Geobooks*, Norwich, 618pp.
- van de Plassche, O., 1991, Late Holocene sea-level fluctuations on the shore of Connecticut inferred from transgressive and regressive overlap boundaries in salt-marsh deposits: *Journal of Coastal Research*, v. Special Issue 11, p. 159-179.
- van de Plassche, O., van der Borg, K., and de Jong, A.F.M., 2002, Relative sea-level rise across the Eastern Border fault (Brandford, Connecticut): evidence against seismotectonic movements: *Marine Geology*, v. 184, p. 61-68.

Woodroffe, S.A., 2006, Holocene relative sea-level changes in Cleveland Bay, North Queensland, Australia: Thesis, Durham University, 155pp.

Woodworth, P.L., and Player, R., 2003, The permanent service for mean sea level: An update to the 21st century: *Journal of Coastal Research*, v. 19, p. 287-295.

## SUPPLEMENTARY FIGURES

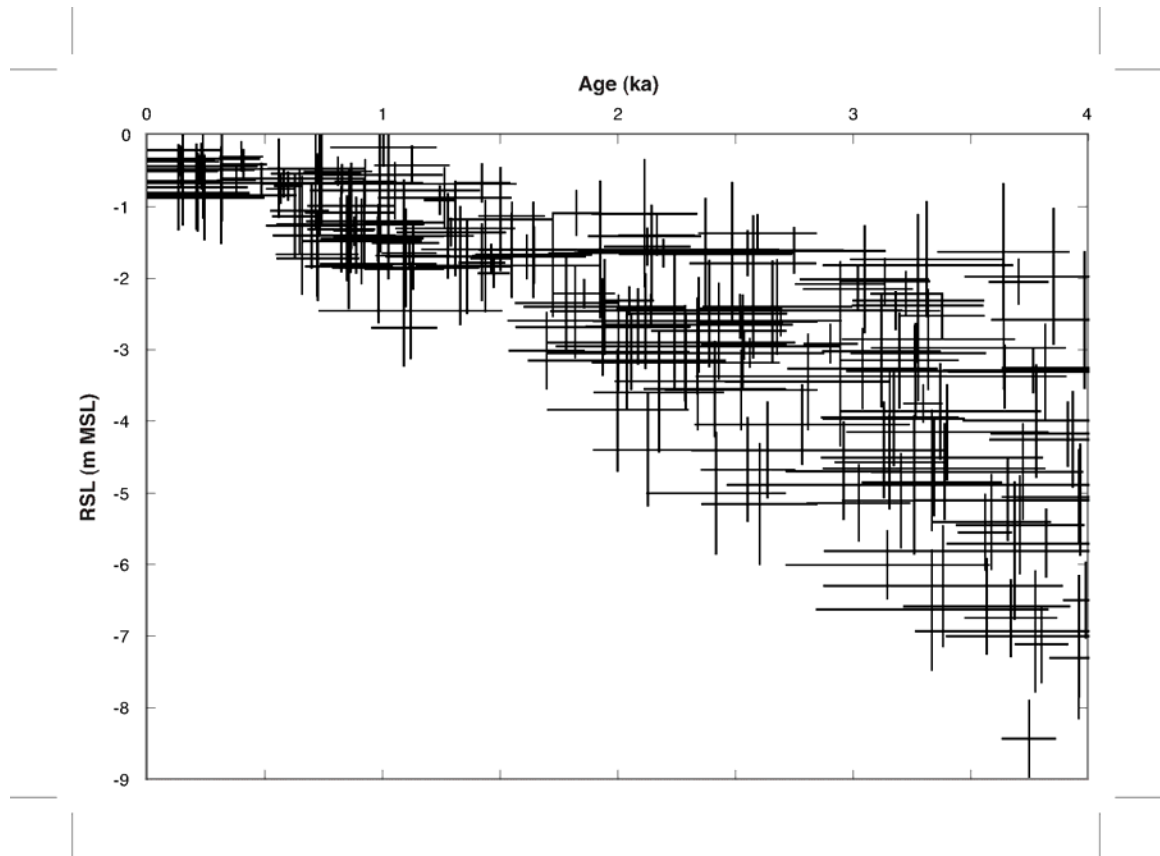

Figure DR1. All 212 radiocarbon dated basal index points, covering the last 4 kyr. The data demonstrates the considerable scatter caused by the differential GIA along the Atlantic Coast.

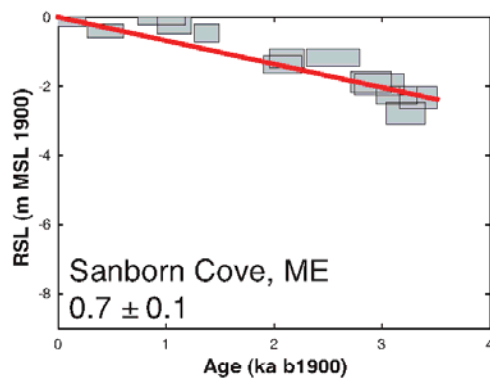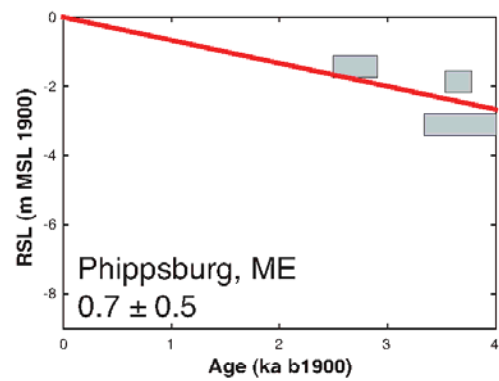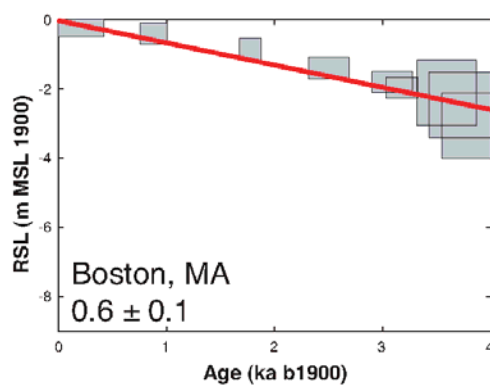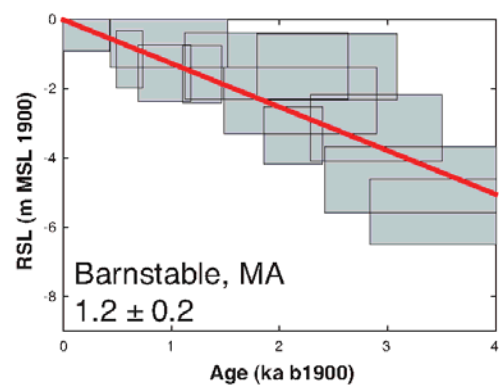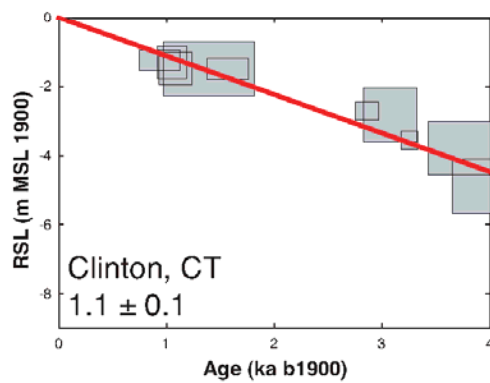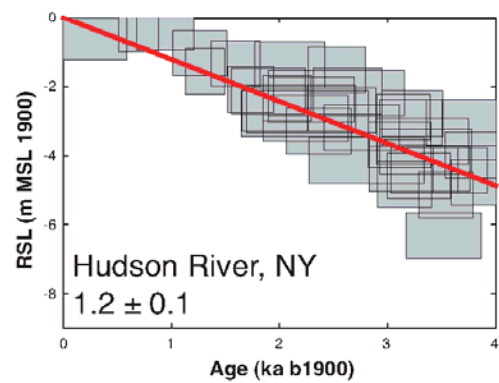

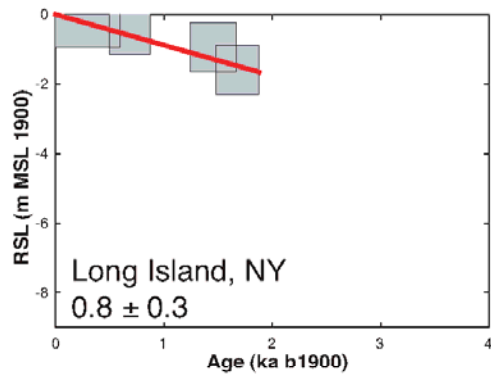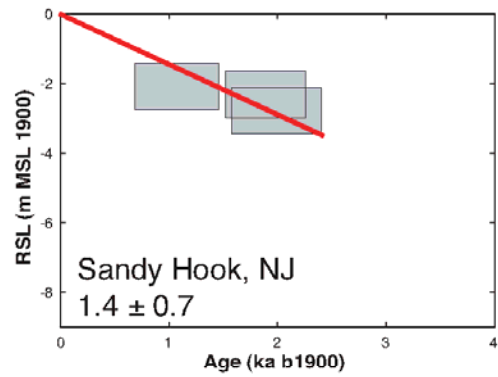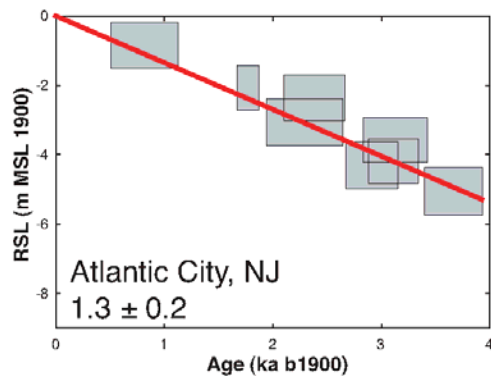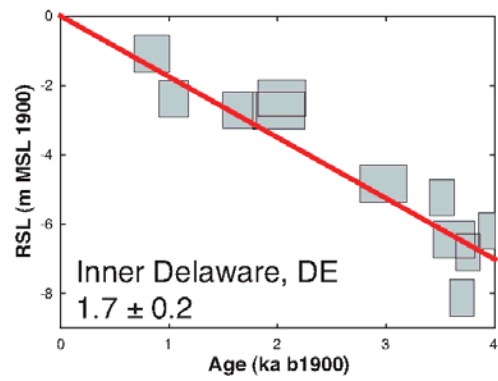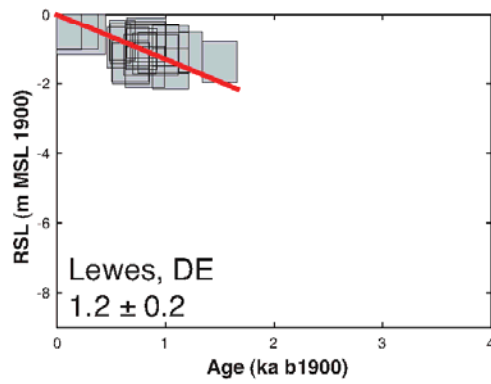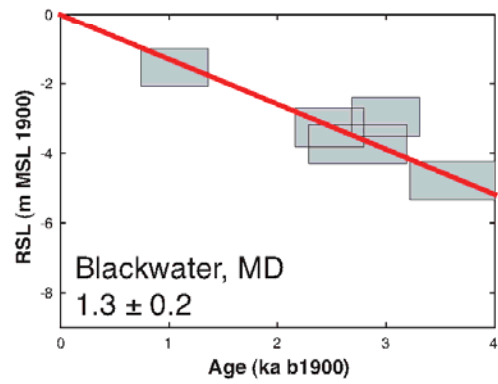

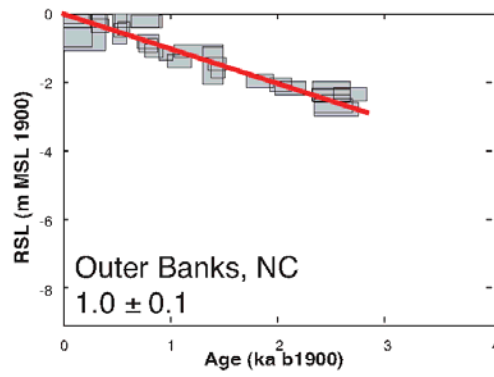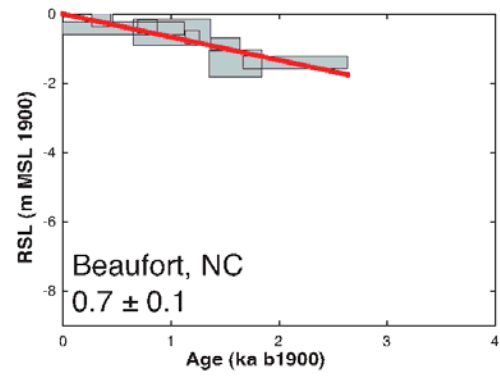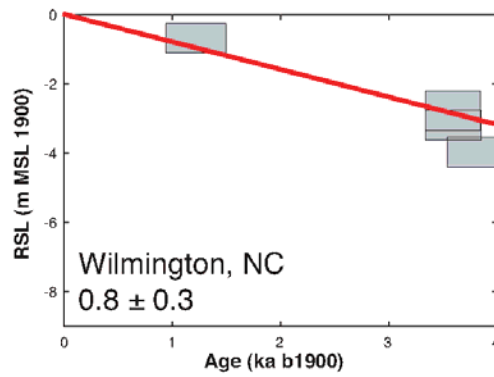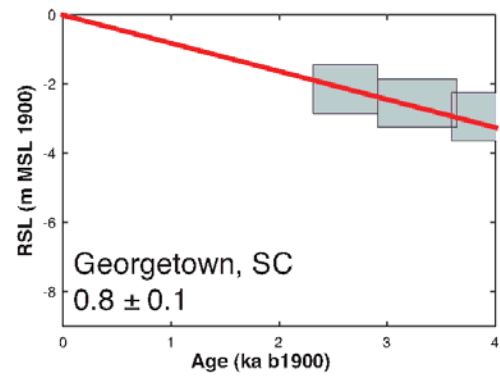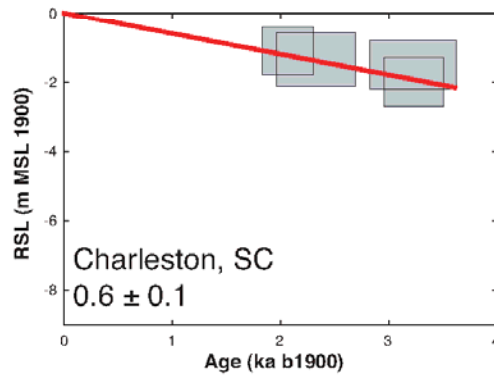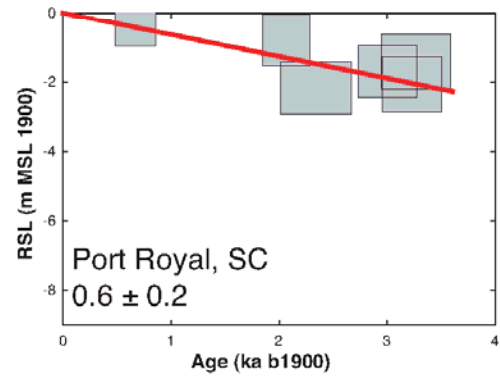

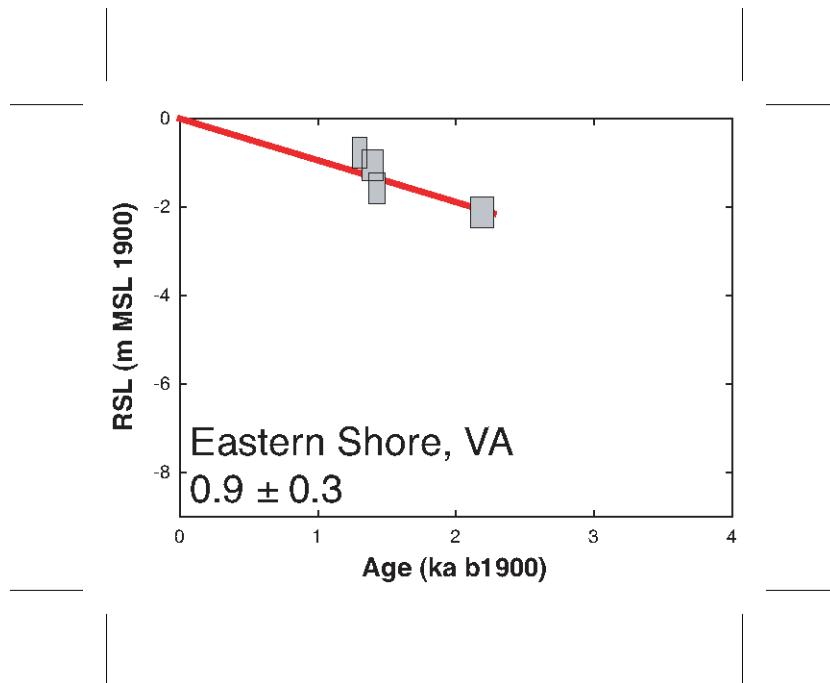

Figure DR2a-d. 19 locations along the US Atlantic Coast with 3 or more basal sea-level index points and the late Holocene rates of RSL rise. Sea-level index points are plotted as calibrated age versus change in RSL relative to MSL in AD 1900 (m). The red line is the linear regression for each site. Rates and errors shown to 1 d.p. Data sources for sea level index points are referenced in Table DR1.

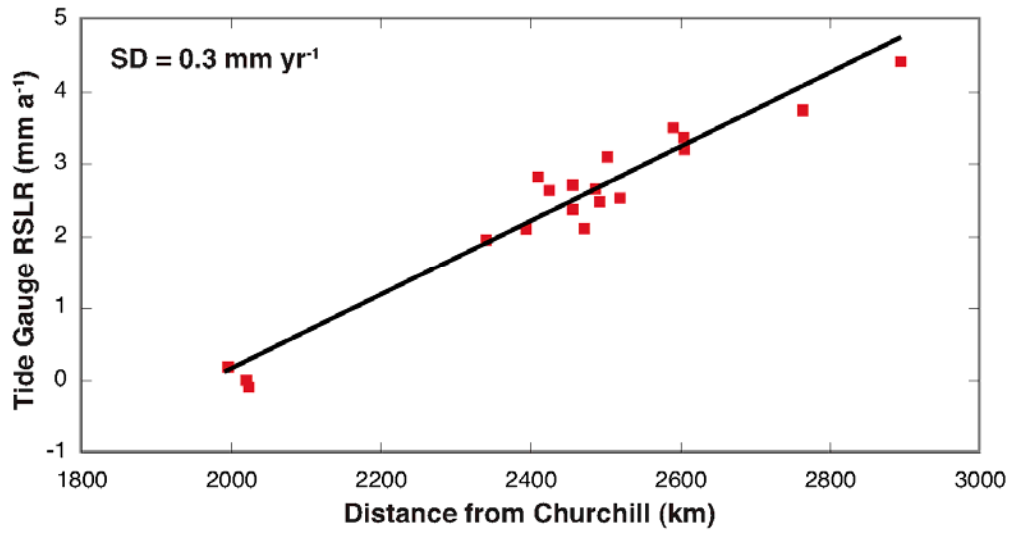

Figure 3. Long-term tide gauge records from Canada to Virginia, USA, plotted against distance from Churchill, Canada. The regression line demonstrates the methodology used to ascertain an appropriate error for the tide gauges.
